# Supplementary material
Source: PubMed Central journal article supplement (PMC10745124)
Supplement: NIHMS1926797-supplement-Appendix.pdf [file NIHMS1926797-supplement-Appendix.pdf]

## **Supplementary Appendix**

This appendix has been provided by the authors to give readers additional information about their work.

Supplement to: Qin Yao, Máire E. Doyle, Qing-Rong Liu, et al. Long-Term Dysfunction of Taste Papillae in SARS-CoV-2. NEJM Evid. DOI: 10.1056/ EVIDoa2300046

# Supplementary Appendix

This appendix has been provided by the authors to give readers additional information about their work.

## **Table of contents:**

|                                    |          |
|------------------------------------|----------|
| Supplemental Figure 1-6            | page 3-8 |
| Supplemental Table 1               | page 9   |
| Supplemental Table 2               | page 10  |
| Supplemental Table 3               | page 11  |
| Supplemental Table 4               | page 11  |
| Supplemental Table 5               | page 12  |
| List of Non-Standard Abbreviations | page 13  |
| Authorship                         | page 13  |
| Supplemental references            | page 14  |

Figure S1: Controls Used to Verify SARS-CoV-2 IF and FISH Staining.

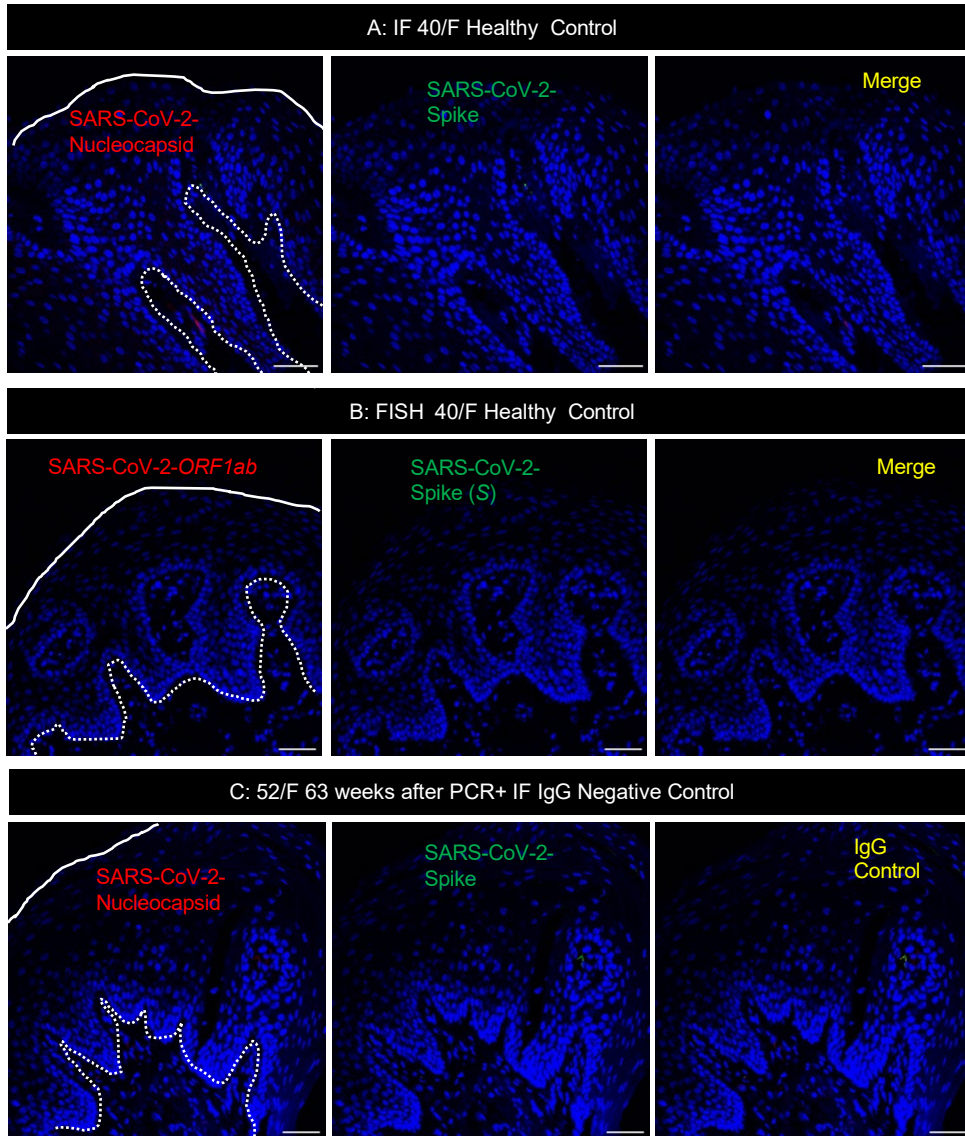

Panel A shows IF staining for SARS-CoV-2 nucleocapsid (left panel) and spike protein (middle panel) in 40-year-old female control fungiform papilla, confirming the absence of virus in a healthy control. Panel B shows FISH staining for the *ORF1ab* (left panel) and Spike (S) (middle panel) probes in 40-year-old female control fungiform papilla, confirming the absence of virus and replication of virus in a healthy control. Panel C shows a 52-year-old female PASC (63 weeks after PCR+) fungiform papilla lacking SARS-CoV-2 nucleocapsid (left panel) and spike protein (middle panel) IF signals when mouse and rabbit IgGs are substituted for primary antibodies. In panels A-C, the solid white line indicates FP surface, the white dotted line demarcates the epithelial layer from the lamina propria. Scale bars are 50  $\mu$ m.

Figure S2 Pathology of FP from PASC Patients with Long-Term Taste Deficits Before and After Recovered.

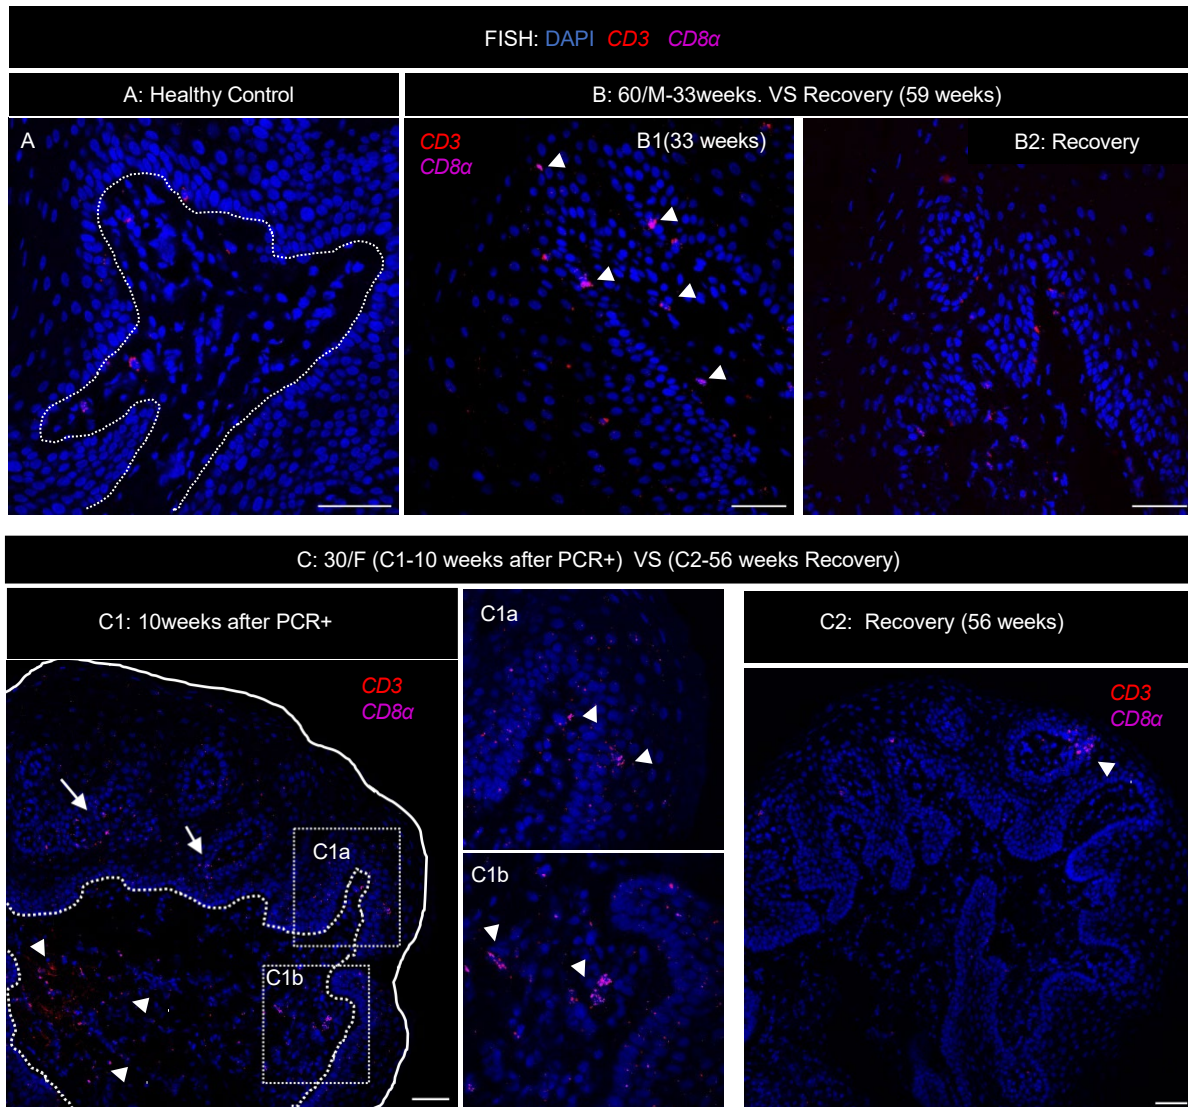

Panels A, B and C show FISH using probes for *CD3* (red dots) and *CD8 $\alpha$*  (purple dots) in FP. Panel A shows normal healthy control (40-year-old female) fungiform papilla morphology and no CD8 T cells. Panel B shows multiple CD8 T cells (white arrows) in 60-year-old male 33 weeks after PCR+ fungiform papilla (B1) compared to fungiform papilla from the same individual upon taste perception recovery at 59 weeks (B2). The white dotted line demarcates the epithelium from the lamina propria. Panel C shows CD8 T cells in fungiform papilla from a 30-year-old female with taste disturbances at 10 weeks after PCR+ (C1) compared to fungiform papilla from the same patient upon taste perception upon recovered at 56 weeks (C2). The solid white line indicates the surface of the FP, the dotted white line demarcates the separation of the epithelium from the lamina propria, and the white arrows indicate the presence of CD8 T cells. C1a and C1b show a higher magnification of the areas marked by rectangles in C1. Scale bars are 50  $\mu\text{m}$ .

Figure S3 The Morphology of a Healthy Taste Bud/Fungiform Papilla and Morphological changes in Taste Bud/FP of PASC Patients with Long-Term Taste Disturbances.

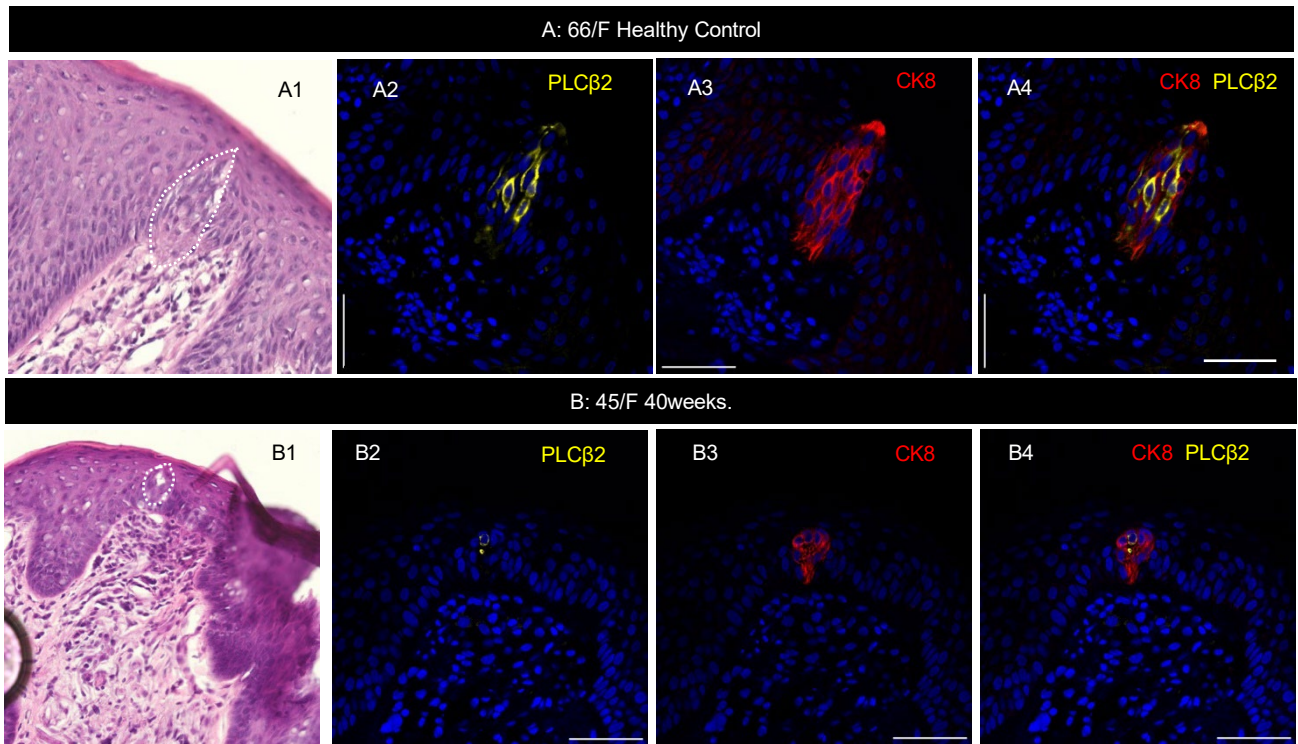

Panel A shows consecutive sections of FP from a healthy 66-year-old female. The dotted white lines outline a taste bud in a H&E-stained section (A1). This same taste bud can also be seen in the adjacent sections stained by IF for PLCβ2 (yellow, A2) and CK8 (red, A3). Note that all the taste receptor cells in the taste bud are positive for CK8 and most of them stain robustly for PLCβ2 (A4).

Panel B shows consecutive sections of FP from a 45-year-old female 40 weeks after PCR+. The dotted white lines outline a taste bud in a H&E-stained section (B1). This same taste bud can also be seen in the adjacent sections stained by IF for PLCβ2 (yellow, B2) and CK8 (red, B3). Note the weak staining for the taste cell marker CK8 and only one cell appears to be positive for PLCβ2 (B2 and B4, yellow).

Scale bars are 50 μm.

Figure S4 Morphological Changes in Taste Buds and FP of PASC Patients with Long-Term Taste Disturbances is Resolved Upon Spontaneous Recovered.

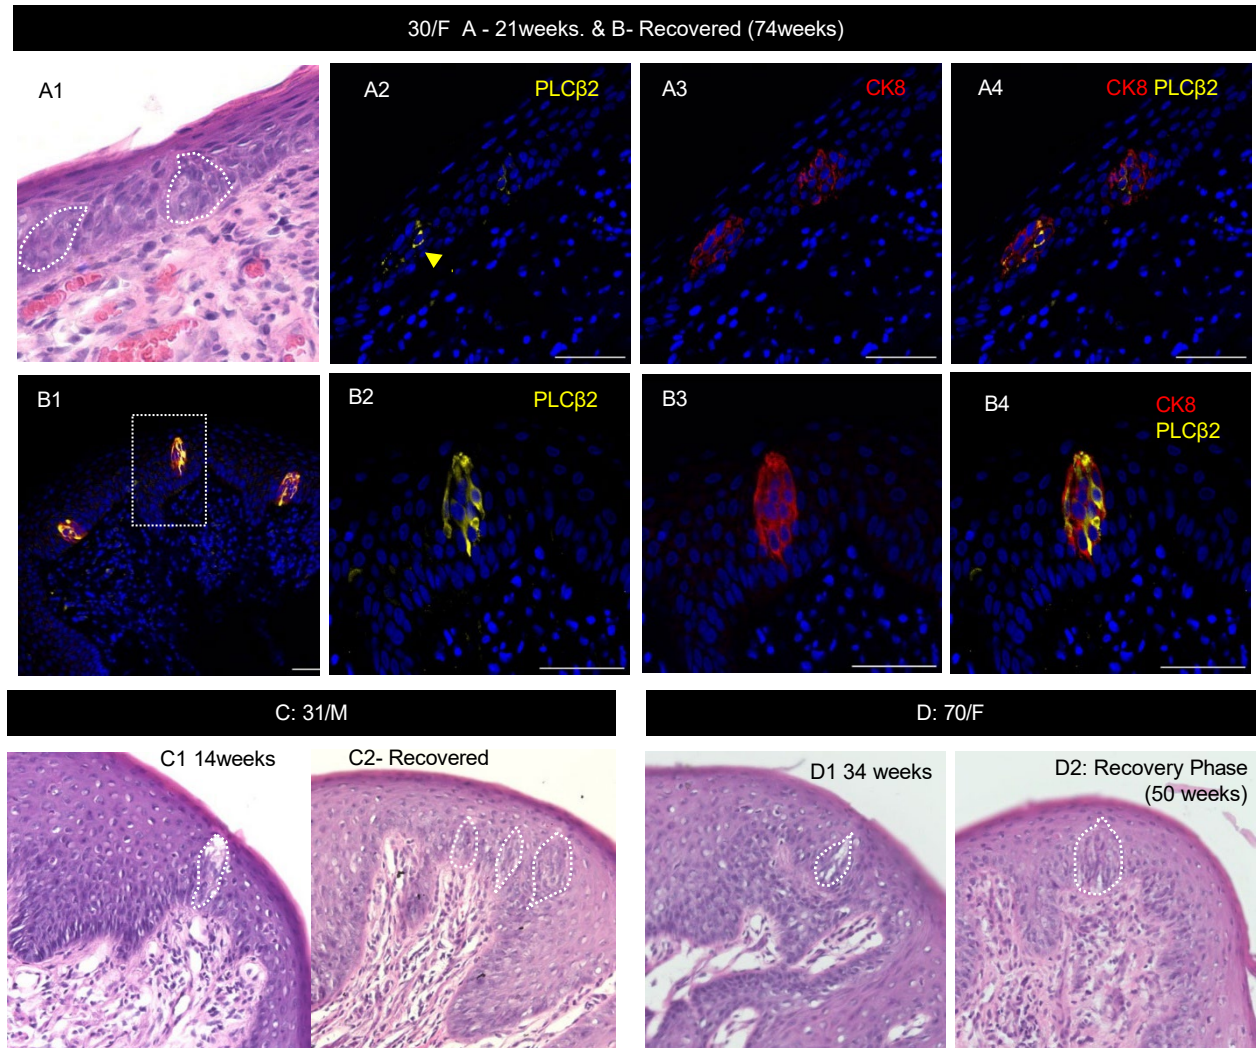

We followed a 30-year-old female with multiple biopsies from 21 weeks after PCR+ to full taste perception recovered at 74 weeks. Panels A1-A4 show consecutive sections of FP from this patient at 21 weeks after PCR+. The white dotted lines outline two malformed taste buds in the H&E-stained section (A1), while the adjacent sections are IF stained for PLC $\beta$ 2 (yellow, A2) and CK8 (red, A3). Note only one taste receptor cell appears to be positive for PLC $\beta$ 2 (A2, yellow arrow) and the weak staining for the taste receptor cell marker CK8. Panel B shows IF for PLC $\beta$ 2 (yellow) and CK8 (red) in FP taken from the same individual at 74 weeks after PCR+ when her taste perception had recovered. Note three more normally formed taste buds now each containing robust signal for PLC $\beta$ 2 (B1). Panels B2-B4 show higher magnification of the rectangles marked in B1. Panel C shows representative images of an infected (C1 and D1) and healthy (C2 and D2) FP from two different individuals who underwent spontaneous recovery from PASC associated taste disturbances. White dotted lines outline the taste buds. Note the infected FPs only have one small taste (C1 and D1). Upon recovery there more taste buds (C2) that are more normal in size and shape (C2 and D2) in each fungiform papilla. Scale bars are 50  $\mu$ m.

Figure S5 Taste Bud and FP Neurites are Disrupted in PASC with Long-Term Taste Disturbances and Resolved Upon Spontaneous Recovered.

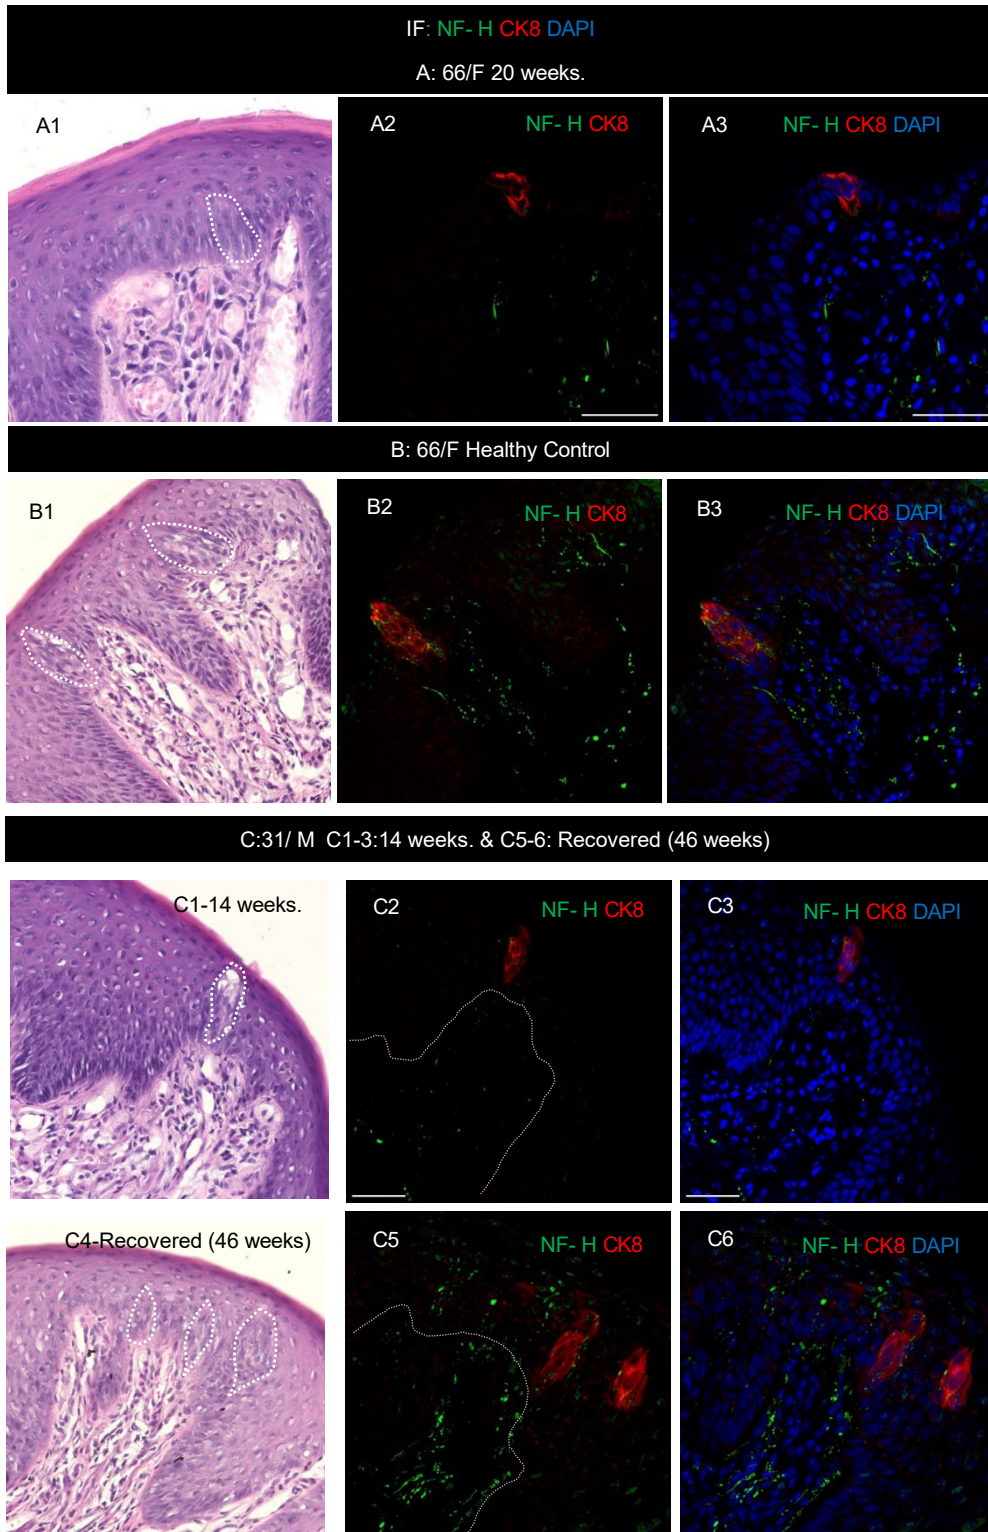

Representative images are shown of FP from a PASC patient (Panel A), healthy control (Panel B) and PASC patient (Panels C1-C3) who subsequently recovered (Panels C4-C6). Left panel in each case shows H&E staining in which the taste buds are outlined by white dotted lines. The middle and right panels show IF staining for CK8 (red) and the neurites marker neurofilament heavy NF-H (green) in the adjacent section in each individual's FP. White dotted line delineates the epithelium from the lamina propria. Note that the taste bud neurites are sparse and not well connected in the patients' FP (A1-A3 and C1-C3). By contrast both the healthy FP (B1-B3) and the FP taken from the individual when their taste perception had returned at 46 weeks (C4-C6) show multiple taste buds and the presence of afferent fibers. Scale bars are 50  $\mu$ m.



Figure S6: SARS-CoV-2 Persists in FP from PASC Patient at 34 Weeks After PCR+.

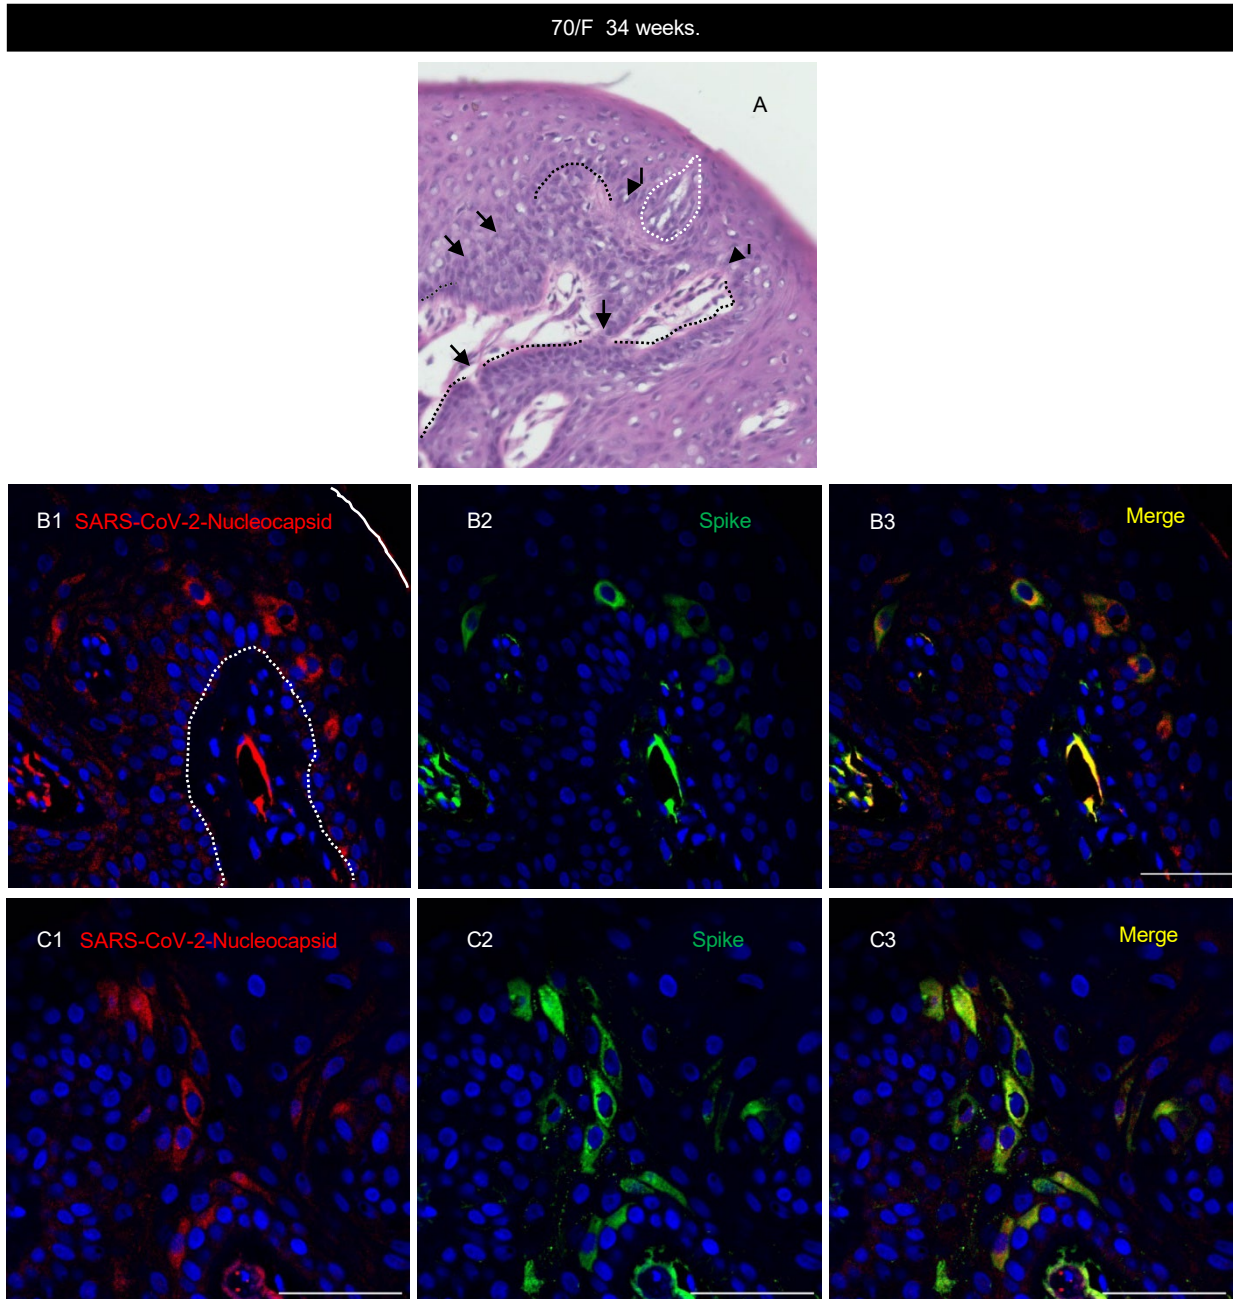

This figure shows H&E and IF of sections of FP biopsied from a 70-year-old female at 34 weeks after PCR+ when she was still experiencing taste disturbances. Panel A shows H&E staining of a fungiform papilla section with the malformed taste bud outlined by the white dotted line, and disruption of the continuity of the basal cell layer at the points indicated by the black arrows. Panels B & C show IF staining for the SARS-CoV-2 nucleocapsid (red, B1 and C1) and spike protein (green, B2 and C2) in the epithelium of two FP. The solid white line indicates the surface of FP, and the white dotted lines demarcate the epithelium layer ends from the lamina propria. Note the virus was still present in her FP at 34 weeks after PCR+. Scale bars are 50  $\mu$ m.

Supplemental tables:

Table S1: Characteristics of the Participants

| Identifiers |       | Baseline characteristics   |                |                                                         |                                         |                                 | Laboratory findings in FP |                              |                                        |          |        |
|-------------|-------|----------------------------|----------------|---------------------------------------------------------|-----------------------------------------|---------------------------------|---------------------------|------------------------------|----------------------------------------|----------|--------|
| No.         | Race  | PASC/<br>Acute/<br>Control | Age/<br>Gender | Visit<br>(FPs<br>biopsy)<br>:<br>Weeks<br>After<br>PCR* | Symptoms<br>When<br>Biopsied            | Date of<br>COVID19<br>Diagnosis | Taste<br>Buds<br>Present  | SARS-CoV-2-<br>Spike Protein | SARS-CoV-2-<br>Nucleocapsid<br>Protein | Spike(S) | ORF1ab |
| 1           | N/A   | PASC                       | 20/F           | V1:21                                                   | Hypogeusia & Hyposmia                   | 12/02/2020                      | +                         | +                            | +                                      | +        | N/A    |
| 2           | Cauca | PASC                       | 30/F           | V1:21                                                   | Hypogeusia & Hyposmia                   | 11/09/2020                      | +                         | +                            | N/A                                    | +        | N/A    |
|             |       |                            |                | V2:25                                                   | Improved                                |                                 | -                         | N/A                          | N/A                                    | N/A      | N/A    |
|             |       |                            |                | V3:74                                                   | Recovered                               |                                 | +                         | -                            | -                                      | N/A      | N/A    |
| 3           | AA    | PASC                       | 30/F           | V1:3                                                    | Ageusia                                 | 09/02/2021                      | -                         | N/A                          | N/A                                    | N/A      | N/A    |
|             |       |                            |                | V2:10                                                   | Hypogeusia & no bitter taste            |                                 | +                         | +                            | +                                      | N/A      | N/A    |
|             |       |                            |                | V3:22                                                   | Improved                                |                                 | +                         | -                            | -                                      | N/A      | N/A    |
|             |       |                            |                | V4:56                                                   | Recovered                               |                                 | +                         | -                            | -                                      | N/A      | N/A    |
| 4           | Cauca | PASC                       | 31/M           | V1:7                                                    | Hypogeusia & Hyposmia                   | 2/24/2021                       | +                         | +                            | +                                      | +        | +      |
|             |       |                            |                | V2:14                                                   | Not improved                            |                                 | -                         | +                            | +                                      | +        | +      |
|             |       |                            |                | V3:18                                                   | Not improved                            |                                 | -                         | N/A                          | N/A                                    | N/A      | N/A    |
|             |       |                            |                | V4:46                                                   | Recovered                               |                                 | +                         | -                            | -                                      | N/A      | N/A    |
| 5           | Cauca | PASC                       | 32/F           | V1:40                                                   | Hypogeusia                              | 06/02/2020                      | -                         | -                            | -                                      | N/A      | N/A    |
| 6           | AA    | PASC                       | 37/F           | V1:17                                                   | Hypogeusia & Hyposmia                   | 01/27/2021                      | +                         | +                            | N/A                                    | +        | +      |
|             |       |                            |                | V2:34                                                   | Hypogeusia & No sweet taste             |                                 | -                         | +                            | +                                      | +        | +      |
|             |       |                            |                | V3:42                                                   | No change                               |                                 | -                         | +                            | +                                      | +        | +      |
|             |       |                            |                | V4:67                                                   | Recovered                               |                                 | +                         | -                            | -                                      | N/A      | N/A    |
| 7           | Cauca | PASC                       | 45/F           | V1:25                                                   | Ageusia                                 | 12/14/2020                      | -                         | N/A                          | N/A                                    | N/A      | N/A    |
|             |       |                            |                | V2:40                                                   | Hypogeusia                              |                                 | +                         | +                            | +                                      | +        | +      |
|             |       |                            |                | V3:57                                                   | Dysgeusia                               |                                 | +                         | +                            | +                                      | N/A      | N/A    |
| 8           | Cauca | PASC                       | 49/F           | V1:20                                                   | Hypogeusia & Hyposmia                   | July/2021                       | -                         | +                            | N/A                                    | N/A      | N/A    |
| 9           | Cauca | PASC                       | 52/F           | V1:31                                                   | Hypogeusia                              | 09/27/2020                      | +                         | +                            | +                                      | +        | N/A    |
|             |       |                            |                | V2:63                                                   | Improved, weak sweet taste              |                                 | +                         | +                            | +                                      | N/A      | N/A    |
| 10          | Cauca | PASC                       | 60/M           | V1:6/21/19                                              | Pre-COVID                               | Pre-COVID                       | +                         | -                            | -                                      | -        | N/A    |
|             |       |                            |                | V2:8                                                    | Hypogeusia & Hyposmia                   | 07/01/2020                      | -                         | +                            | N/A                                    | +        | N/A    |
|             |       |                            |                | V3:13                                                   | Hypogeusia & Hyposmia                   |                                 | -                         | +                            | N/A                                    | +        | N/A    |
|             |       |                            |                | V4:33                                                   | Improved                                |                                 | -                         | +                            | N/A                                    | +        | N/A    |
|             |       |                            |                | V5:59                                                   | Recovered                               |                                 | +                         | -                            | -                                      | -        | N/A    |
| 11          | AA    | PASC                       | 63/F           | V1:19                                                   | Hypogeusia & Hyposmia<br>No sweet taste | 01/28/2021                      | -                         | +                            | N/A                                    | N/A      | N/A    |
| 12          | Cauca | PASC                       | 66/F           | V1:20                                                   | Ageusia & Phantosmia                    | 11/17/2020                      | +                         | +                            | +                                      | +        | N/A    |
|             |       |                            |                | V2:83                                                   | Recovered                               |                                 | +                         | -                            | -                                      | N/A      | N/A    |
| 13          | Cauca | PASC                       | 68/F           | V1:16                                                   | Hypogeusia                              | 11/22/2020                      | -                         | -                            | -                                      | N/A      | N/A    |
|             |       |                            |                | V2:59                                                   | Hypogeusia                              |                                 | -                         | -                            | -                                      | N/A      | N/A    |
| 14          | Cauca | PASC                       | 69/F           | V1:63                                                   | Hypogeusia & No bitter and sour taste   | 9/14/2020                       | -                         | +                            | +                                      | N/A      | N/A    |
| 15          | Cauca | PASC                       | 69/F           | V1:49                                                   | Dysgeusia                               | July/2021                       | -                         | +                            | N/A                                    | N/A      | N/A    |
| 16          | Cauca | PASC                       | 70/F           | V1:34                                                   | Ageusia & Phantosmia                    | 11/29/2020                      | +                         | +                            | +                                      | +        | +      |
|             |       |                            |                | V2:50                                                   | Improved                                |                                 | +                         | +                            | +                                      | N/A      | N/A    |
| 17          | Cauca | Acute                      | 31/M           | V1:2                                                    | Hypogeusia & Hyposmia                   | 11/30/2021                      | -                         | +                            | +                                      | N/A      | N/A    |
| 18          | Cauca | Acute                      | 31/F           | V1:2                                                    | Hypogeusia & Hyposmia                   | 12/24/2021                      | -                         | +                            | +                                      | N/A      | N/A    |
| 19          | Cauca | Acute                      | 45/F           | V1:2                                                    | Hypogeusia & Hyposmia                   | 08/12/2020                      | +                         | +                            | +                                      | +        | +      |
| 20          | N/A   | Control                    | 23/M           | -                                                       | N/A                                     | N/A                             | +                         | -                            | -                                      | N/A      | N/A    |
| 21          | Cauca | Control                    | 24/F           | -                                                       | N/A                                     | N/A                             | +                         | -                            | -                                      | N/A      | N/A    |
| 22          | Cauca | Control                    | 27/M           | -                                                       | N/A                                     | N/A                             | +                         | -                            | -                                      | N/A      | N/A    |
| 23          | Cauca | Control                    | 32/M           | -                                                       | N/A                                     | N/A                             | +                         | -                            | N/A                                    | N/A      | N/A    |
| 24          | Hisp  | Control                    | 33/F           | -                                                       | N/A                                     | N/A                             | +                         | -                            | -                                      | -        | N/A    |
| 25          | Hisp  | Control                    | 35/M           | -                                                       | N/A                                     | N/A                             | +                         | -                            | -                                      | -        | N/A    |
| 26          | Cauca | Control                    | 40/F           | -                                                       | N/A                                     | N/A                             | +                         | -                            | -                                      | -        | -      |
| 27          | Cauca | Control                    | 67/F           | -                                                       | N/A                                     | N/A                             | +                         | -                            | N/A                                    | N/A      | N/A    |
| 28          | Cauca | Control                    | 91/F           | -                                                       | N/A                                     | N/A                             | +                         | -                            | -                                      | N/A      | N/A    |
| 29          | Cauca | Control                    | 33/M           | V1:10                                                   | NO taste/smell issues                   | 8/28/2021                       | +                         | -                            | -                                      | -        | N/A    |
| 30          | Cauca | Control                    | 44/F           | V1:7                                                    | NO taste/smell issues                   | 9/10/22                         | +                         | -                            | -                                      | N/A      | N/A    |
| 31          | Cauca | Control                    | 47/F           | V1:7                                                    | NO taste/smell issues                   | 3/3/2022                        | +                         | -                            | -                                      | N/A      | N/A    |
| 32          | Cauca | Control                    | 66/F           | V1:11                                                   | NO taste/smell issues                   | March/2022                      | +                         | -                            | -                                      | N/A      | N/A    |

(Cauca: Caucasian; AA: African American; Hisp: Hispanic; + positive; - negative, N/A not available. 1-16 PASC patients, 17-19 Acute infection patients, 20-28 Healthy Control with no infection, 29-32 PCR+ with no long-lasting taste and/or smell symptoms. Ageusia: complete loss of taste; Hypogeusia: partial loss of taste; Dysgeusia: distorted sense of taste)

**Table S2.: Primary Antibodies**

| Antigen                                                 | Source Species | Dilution | Manufacturer; Catalog #, RRID               | Reference |
|---------------------------------------------------------|----------------|----------|---------------------------------------------|-----------|
| SARS-CoV / SARS-CoV-2 (COVID-19) spike antibody [1A9]   | Mouse          | 1:100    | GeneTex; GTX632604, AB_2864418              | 1-3       |
| SARS/SARS-CoV-2 Nucleocapsid Monoclonal Antibody (E16C) | Mouse          | 1:100    | Thermo Fisher; MA1-7403, AB_1018420         | 1,4,5     |
| SARS-CoV-2 (COVID-19) nucleocapsid antibody             | Rabbit         | 1:100    | GeneTex; GTX135361, AB_2887484              | 1,6,7     |
| SARS-CoV-2 Spike (RBD) Antibody (T01KHuRb)              | Rabbit         | 1:200    | Invitrogen; 703959, AB_2866478              | 8,9       |
| SARS-CoV-2 Spike (RBD) Antibody (T01KHu)                | Human          | 1:200    | Invitrogen; 703958, AB_2866477              | 10        |
| NF-H                                                    | Rabbit         | 1:1000   | Novus Biologicals; NB300-135, AB_10001839   | 11,12     |
| PLC $\beta$ 2                                           | Rabbit         | 1:100    | Santa Cruz Biotechnology; sc-206, AB_632197 | 13-16     |
| CK8(cytokeratin8)                                       | Rat            | 1:200    | DSHB; TROMA-I, AB_531826                    | 16        |

**Table S3: Secondary Antibodies**

| Antigen    | Source Species        | Dilution | Manufacturer; Catalog #, RRID   |
|------------|-----------------------|----------|---------------------------------|
| Rabbit IgG | Goat (AlexaFluor 488) | 1:1000   | Invitrogen; A27034, AB_2536097  |
| Rabbit IgG | Goat (AlexaFluor 568) | 1:1000   | Invitrogen; A11036, AB_10563566 |
| Human IgG  | Goat (AlexaFluor 488) | 1:2000   | Invitrogen; A-11013, AB_2534080 |
| Mouse IgG  | Goat (AlexaFluor 488) | 1:1000   | Invitrogen; A28175, AB_2536161  |
| Mouse IgG  | Goat (AlexaFluor 568) | 1:1000   | Invitrogen; A-11004, AB_2534072 |
| Mouse IgG  | Goat (AlexaFluor 647) | 1:1000   | Invitrogen; A-21235, AB_2535804 |
| Rat IgG    | Goat (AlexaFluor 568) | 1:1000   | Invitrogen; A-11077, AB_2534121 |
| Rat IgG    | Goat (AlexaFluor 647) | 1:1000   | Invitrogen; A21247, AB_141778   |

**Table S4: IgG Controls**

| Antigen             | Manufacturer; Catalog #, RRID                   |
|---------------------|-------------------------------------------------|
| Human IgG control   | R & D Systems; 1-001-A, AB_907192               |
| Mouse IgG1 control  | Thermo Fisher Scientific; 14-4714-82, AB_470111 |
| Mouse IgG2a control | R & D Systems; MAB003, AB_357345                |
| Mouse IgG2b control | Thermo Fisher Scientific; 14-4732-82, AB_470117 |
| Rabbit IgG control  | R & D Systems; AB-105-C, AB_354266              |
| Rat IgG control     | BioLegend; 400526, AB_2864284                   |

**Table S5: FISH Probes**

| Gene Symbol                 | FISH probe                             | Catalog #              | Accession number | ZZ probe pairs                                 | Nucleotide position                                                |
|-----------------------------|----------------------------------------|------------------------|------------------|------------------------------------------------|--------------------------------------------------------------------|
| SARS-CoV-2 Spike            | Probe - V-nCoV2019-S                   | 848561-C1              | NC_045512.2      | 20                                             | 21,631 - 23,303                                                    |
| SARS-CoV-2 ORF1ab           | Probe - V-nCoV2019-orf1ab-sense        | 859151-C2              | NC_045512.2      | 40                                             | 1583 -4388                                                         |
| IL1B                        | Probe-Hs-IL1B                          | 310361-C2              | NM_000576        | 20                                             | 2 - 1319                                                           |
| CD3 Pool (CD3D, CD3E, CD3G) | Probe -Hs-CD3-pool-C2                  | 426621-C2              | N/A              | 11 (Hs-CD3D).<br>20 (Hs-CD3E).<br>18 (Hs-CD3G) | 180 – 743 (Hs-CD3D);<br>26 – 1288 (Hs-CD3E).<br>40 – 911 (Hs-CD3G) |
| CD8A                        | Probe -Hs-CD8A-C3<br>Probe -Hs-CD8A-C2 | 560391-C3<br>560391-C2 | NM_001768.6      | 20                                             | 971 - 2342                                                         |
| Perforin (PRF1)             | Probe - Hs-PRF1                        | 407381-C1              | M28393.1         | 19                                             | 7 - 1587                                                           |
| GZMB                        | Probe - Hs-GZMB                        | 445971-C1              | NM_004131.4      | 11                                             | 3 - 912                                                            |

## List of Non-Standard Abbreviations

|               |                                                 |
|---------------|-------------------------------------------------|
| ACE2          | Angiotensin-Converting Enzyme-2                 |
| COVID-19      | Coronavirus Disease 2019                        |
| CD            | Cluster of Differentiation                      |
| FP            | Fungiform Papillae                              |
| FISH          | In-Situ Hybridization                           |
| H&E           | Hematoxylin and eosin                           |
| IF            | Immunofluorescence                              |
| NF-H          | Neurofilament-heavy chain                       |
| ORF1ab        | Open Reading Frame 1ab                          |
| PASC          | Post-Acute Sequelae of COVID-19                 |
| PLC $\beta$ 2 | Phospholipase C $\beta$ 2                       |
| SARS-CoV-2    | Severe Acute Respiratory Syndrome Coronavirus 2 |
| TRC           | Taste Receptor Cell                             |

## AUTHORSHIP

QY, MED, and JME designed the study; QY and JME gathered, and analyzed the data, wrote the first draft of manuscript; NPW provided the immunological expertise and edited the immunology data; MED, QRL, AA and JFOC were involved in sectioning, staining, and analyzing the findings; all contributed to the preparation and development of this manuscript and approved the final draft before submission.

## Supplemental references

1. Wu CT, Lidsky PV, Xiao Y, et al. SARS-CoV-2 infects human pancreatic  $\beta$  cells and elicits  $\beta$  cell impairment. *Cell Metab* 2021;33(8):1565-1576.e5. (In eng). DOI: 10.1016/j.cmet.2021.05.013.
2. Suzuki R, Yamasoba D, Kimura I, et al. Attenuated fusogenicity and pathogenicity of SARS-CoV-2 Omicron variant. *Nature* 2022;603(7902):700-705. (In eng). DOI: 10.1038/s41586-022-04462-1.
3. Ramani A, Müller L, Ostermann PN, et al. SARS-CoV-2 targets neurons of 3D human brain organoids. *Embo j* 2020;39(20):e106230. (In eng). DOI: 10.15252/embj.2020106230.
4. Subramaniyan B, Larabee JL, Bodas M, et al. Characterization of the SARS-CoV-2 Host Response in Primary Human Airway Epithelial Cells from Aged Individuals. *Viruses* 2021;13(8) (In eng). DOI: 10.3390/v13081603.
5. Loveday EK, Hain KS, Kochetkova I, et al. Effect of Inactivation Methods on SARS-CoV-2 Virion Protein and Structure. *Viruses* 2021;13(4) (In eng). DOI: 10.3390/v13040562.
6. Xiao Y, Lidsky PV, Shirogane Y, et al. A defective viral genome strategy elicits broad protective immunity against respiratory viruses. *Cell* 2021;184(25):6037-6051.e14. (In eng). DOI: 10.1016/j.cell.2021.11.023.
7. Burkett AE, Sher SB, Patel CR, et al. Gastrointestinal Manifestations of COVID-19 Infection: Clinicopathologic Findings in Intestinal Resections Performed at Single Institution. *Front Med (Lausanne)* 2022;9:811546. (In eng). DOI: 10.3389/fmed.2022.811546.
8. Djidrovski I, Georgiou M, Hughes GL, et al. SARS-CoV-2 infects an upper airway model derived from induced pluripotent stem cells. *Stem Cells* 2021;39(10):1310-1321. (In eng). DOI: 10.1002/stem.3422.
9. Crunfli F, Carregari VC, Veras FP, et al. Morphological, cellular, and molecular basis of brain infection in COVID-19 patients. *Proc Natl Acad Sci U S A* 2022;119(35):e2200960119. (In eng). DOI: 10.1073/pnas.2200960119.
10. Goh YS, Ng LFP, Renia L. A flow cytometry-based assay for serological detection of anti-spike antibodies in COVID-19 patients. *STAR Protoc* 2021;2(3):100671. (In eng). DOI: 10.1016/j.xpro.2021.100671.
11. Donnelly CR, Kumari A, Li L, et al. Probing the multimodal fungiform papilla: complex peripheral nerve endings of chorda tympani taste and mechanosensitive fibers before and after Hedgehog pathway inhibition. *Cell Tissue Res* 2022;387(2):225-247. (In eng). DOI: 10.1007/s00441-021-03561-1.
12. Lee JI, Gurjar AA, Talukder MAH, et al. A novel nerve transection and repair method in mice: histomorphometric analysis of nerves, blood vessels, and muscles with functional recovery. *Sci Rep* 2020;10(1):21637. (In eng). DOI: 10.1038/s41598-020-78481-1.
13. Yang R, Ma H, Thomas SM, Kinnamon JC. Immunocytochemical analysis of syntaxin-1 in rat circumvallate taste buds. *J Comp Neurol* 2007;502(6):883-93. (In eng). DOI: 10.1002/cne.21317.
14. Dvoryanchikov G, Sinclair MS, Perea-Martinez I, Wang T, Chaudhari N. Inward rectifier channel, ROMK, is localized to the apical tips of glial-like cells in mouse taste buds. *J Comp Neurol* 2009;517(1):1-14. (In eng). DOI: 10.1002/cne.22152.
15. Pfister S, Weber T, Härtig W, et al. Novel role of cystic fibrosis transmembrane conductance regulator in maintaining adult mouse olfactory neuronal homeostasis. *J Comp Neurol* 2015;523(3):406-30. (In eng). DOI: 10.1002/cne.23686.
16. Doyle ME, Appleton A, Liu QR, Yao Q, Mazucanti CH, Egan JM. Human Type II Taste Cells Express Angiotensin-Converting Enzyme 2 and Are Infected by Severe Acute Respiratory Syndrome Coronavirus 2 (SARS-CoV-2). *Am J Pathol* 2021;191(9):1511-1519. (In eng). DOI: 10.1016/j.ajpath.2021.05.010.
