# Supplementary material
Source: PubMed Central journal article supplement (PMC10745124)
Supplement: NIHMS1926797-supplement-Data_sharing.pdf [file NIHMS1926797-supplement-Data_sharing.pdf]

## Data Sharing Statement

Qin Yao, Máire E. Doyle, Qing-Rong Liu, et al. Long-Term Dysfunction of Taste Papillae in SARS-CoV-2. NEJM Evid. DOI: 10.1056/EVIDoa2300046.

| Question                                                            | Authors' Response                                             |
|---------------------------------------------------------------------|---------------------------------------------------------------|
| Will the data collected for your study be made available to others? | Yes                                                           |
| Would you like to offer context for your decision?                  | —                                                             |
| Which data?                                                         | Complete de-identified patient data set                       |
| Additional information about data                                   | —                                                             |
| How or where can the data be obtained?                              | eganj@grc.nia.nih.gov qin.yao@nih.gov<br>qingrong.liu@nih.gov |
| When will data availability begin?                                  | With publication                                              |
| When will data availability end?                                    | —                                                             |
| Will any supporting documents be available?                         | —                                                             |
| Which supporting documents?                                         | —                                                             |
| Additional information about supporting documents                   | —                                                             |
| How or where can supporting documents be obtained?                  | —                                                             |
| When will supporting documents availability begin?                  | —                                                             |
| When will supporting documents availability end?                    | —                                                             |
| To whom will data be available?                                     | —                                                             |
| For what type of analysis or purpose?                               | —                                                             |
| By what mechanism?                                                  | —                                                             |
| Any other restrictions?                                             | —                                                             |
| Additional information                                              | —                                                             |

This statement was posted on July 20, 2023, at [evidence.nejm.org](https://evidence.nejm.org).
