# Supplementary material
Source: PubMed Central journal article supplement (PMC10745124)
Supplement: NIHMS1926797-supplement-Disclosures.pdf [file NIHMS1926797-supplement-Disclosures.pdf]

Ashley Appleton

**Discloser Identifier:** 1106191

**Disclosure Purpose:** EV-23-00046.R2

## Summary of Interests

I do not have any interests to disclose at this time.

## Certification

I certify that the information provided in this disclosure is complete and accurate.

Máire Doyle

**Discloser Identifier:** 1106186

**Disclosure Purpose:** EV-23-00046.R2

## Summary of Interests

I do not have any interests to disclose at this time.

## Certification

I certify that the information provided in this disclosure is complete and accurate.

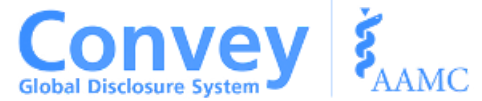

Josephine Egan

**Discloser Identifier:** 957148

**Disclosure Purpose:** EV-23-00046.R2

## Summary of Interests

I do not have any interests to disclose at this time.

## Certification

I certify that the information provided in this disclosure is complete and accurate.

Qing-Rong Liu

**Discloser Identifier:** 990855

**Disclosure Purpose:** EV-23-00046.R2

## Summary of Interests

I do not have any interests to disclose at this time.

## Certification

I certify that the information provided in this disclosure is complete and accurate.

Jennifer O'Connell

**Discloser Identifier:** 1106192

**Disclosure Purpose:** EV-23-00046.R2

## Summary of Interests

I do not have any interests to disclose at this time.

## Certification

I certify that the information provided in this disclosure is complete and accurate.

# Nan-ping Weng

**Discloser Identifier:** 1106196

**Disclosure Purpose:** EV-23-00046.R2

## Summary of Interests

I do not have any interests to disclose at this time.

## Certification

I certify that the information provided in this disclosure is complete and accurate.

Qin Yao

**Discloser Identifier:** 990856

**Disclosure Purpose:** EV-23-00046.R2

## Summary of Interests

I do not have any interests to disclose at this time.

## Certification

I certify that the information provided in this disclosure is complete and accurate.
